# Supplementary material
Source: PubMed Central journal article supplement (PMC2892960)

## Legend for online Figures

**Online Figure 1.** Multipoint Logarithm of the odds (LOD) score (y-axis) from the genome wide linkage analysis for Ang-2. X-axis: Chromosomal position. Analyses were adjusted for all significant correlates of Ang-2 (Table 2).

**Online Figure 2.** Multipoint Logarithm of the odds (LOD) score (y-axis) from the genome wide linkage analysis for sTie-2 levels. X-axis: Chromosomal position. Analyses were adjusted for all significant correlates of sTie-2 (Table 2).

Type of file: figure

Label: Online figure 1

Filename: Online Figure 1.pdf

# In\_Ang2: multivariable adjusted

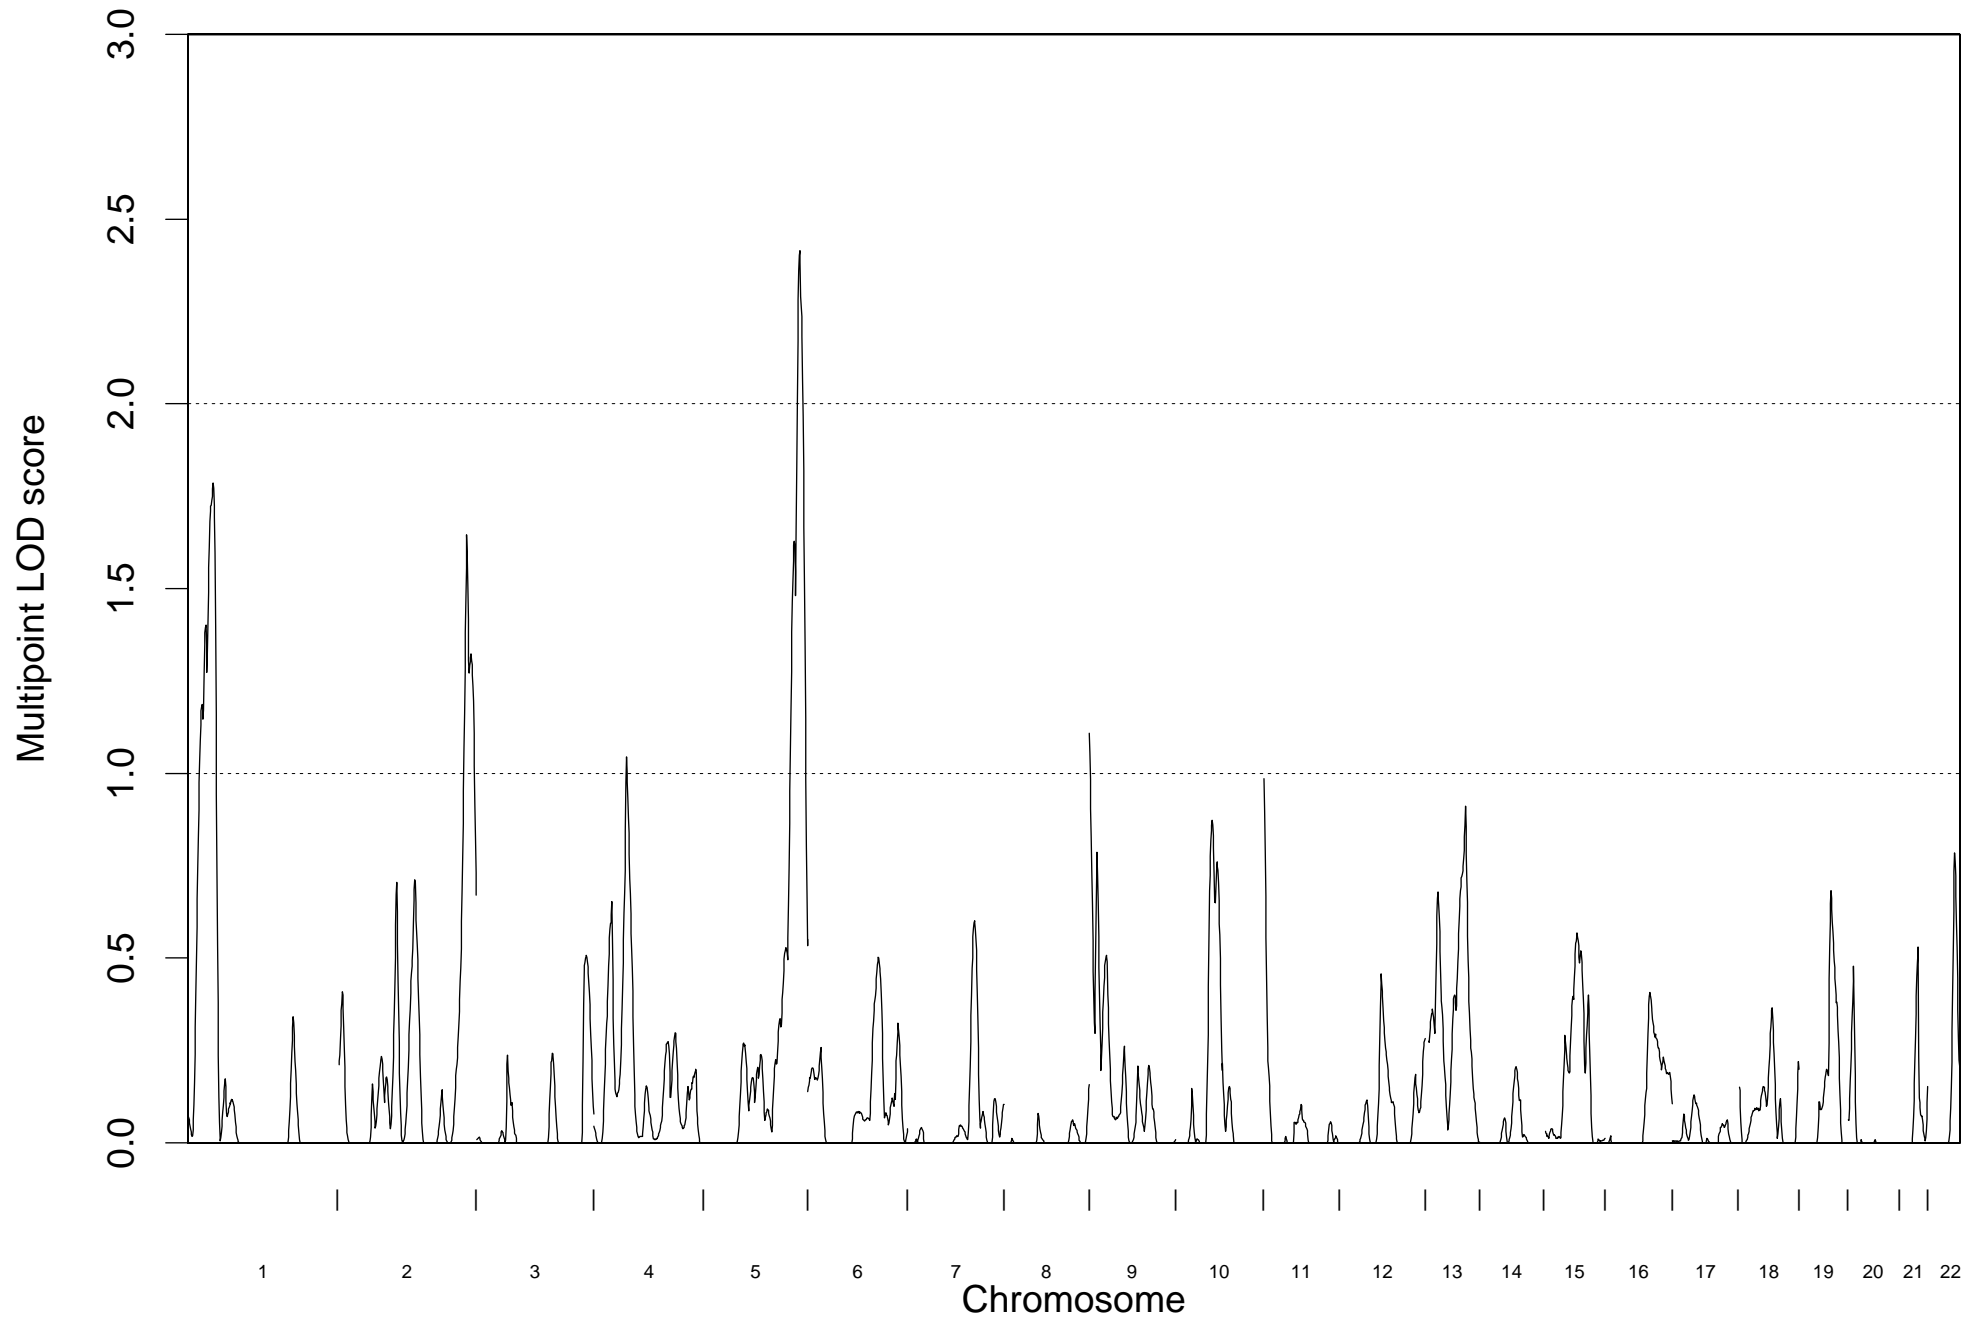

Type of file: figure

Label: Online figure 2

Filename: Online Figure 2.pdf

# In\_Tie2: multivariable adjusted

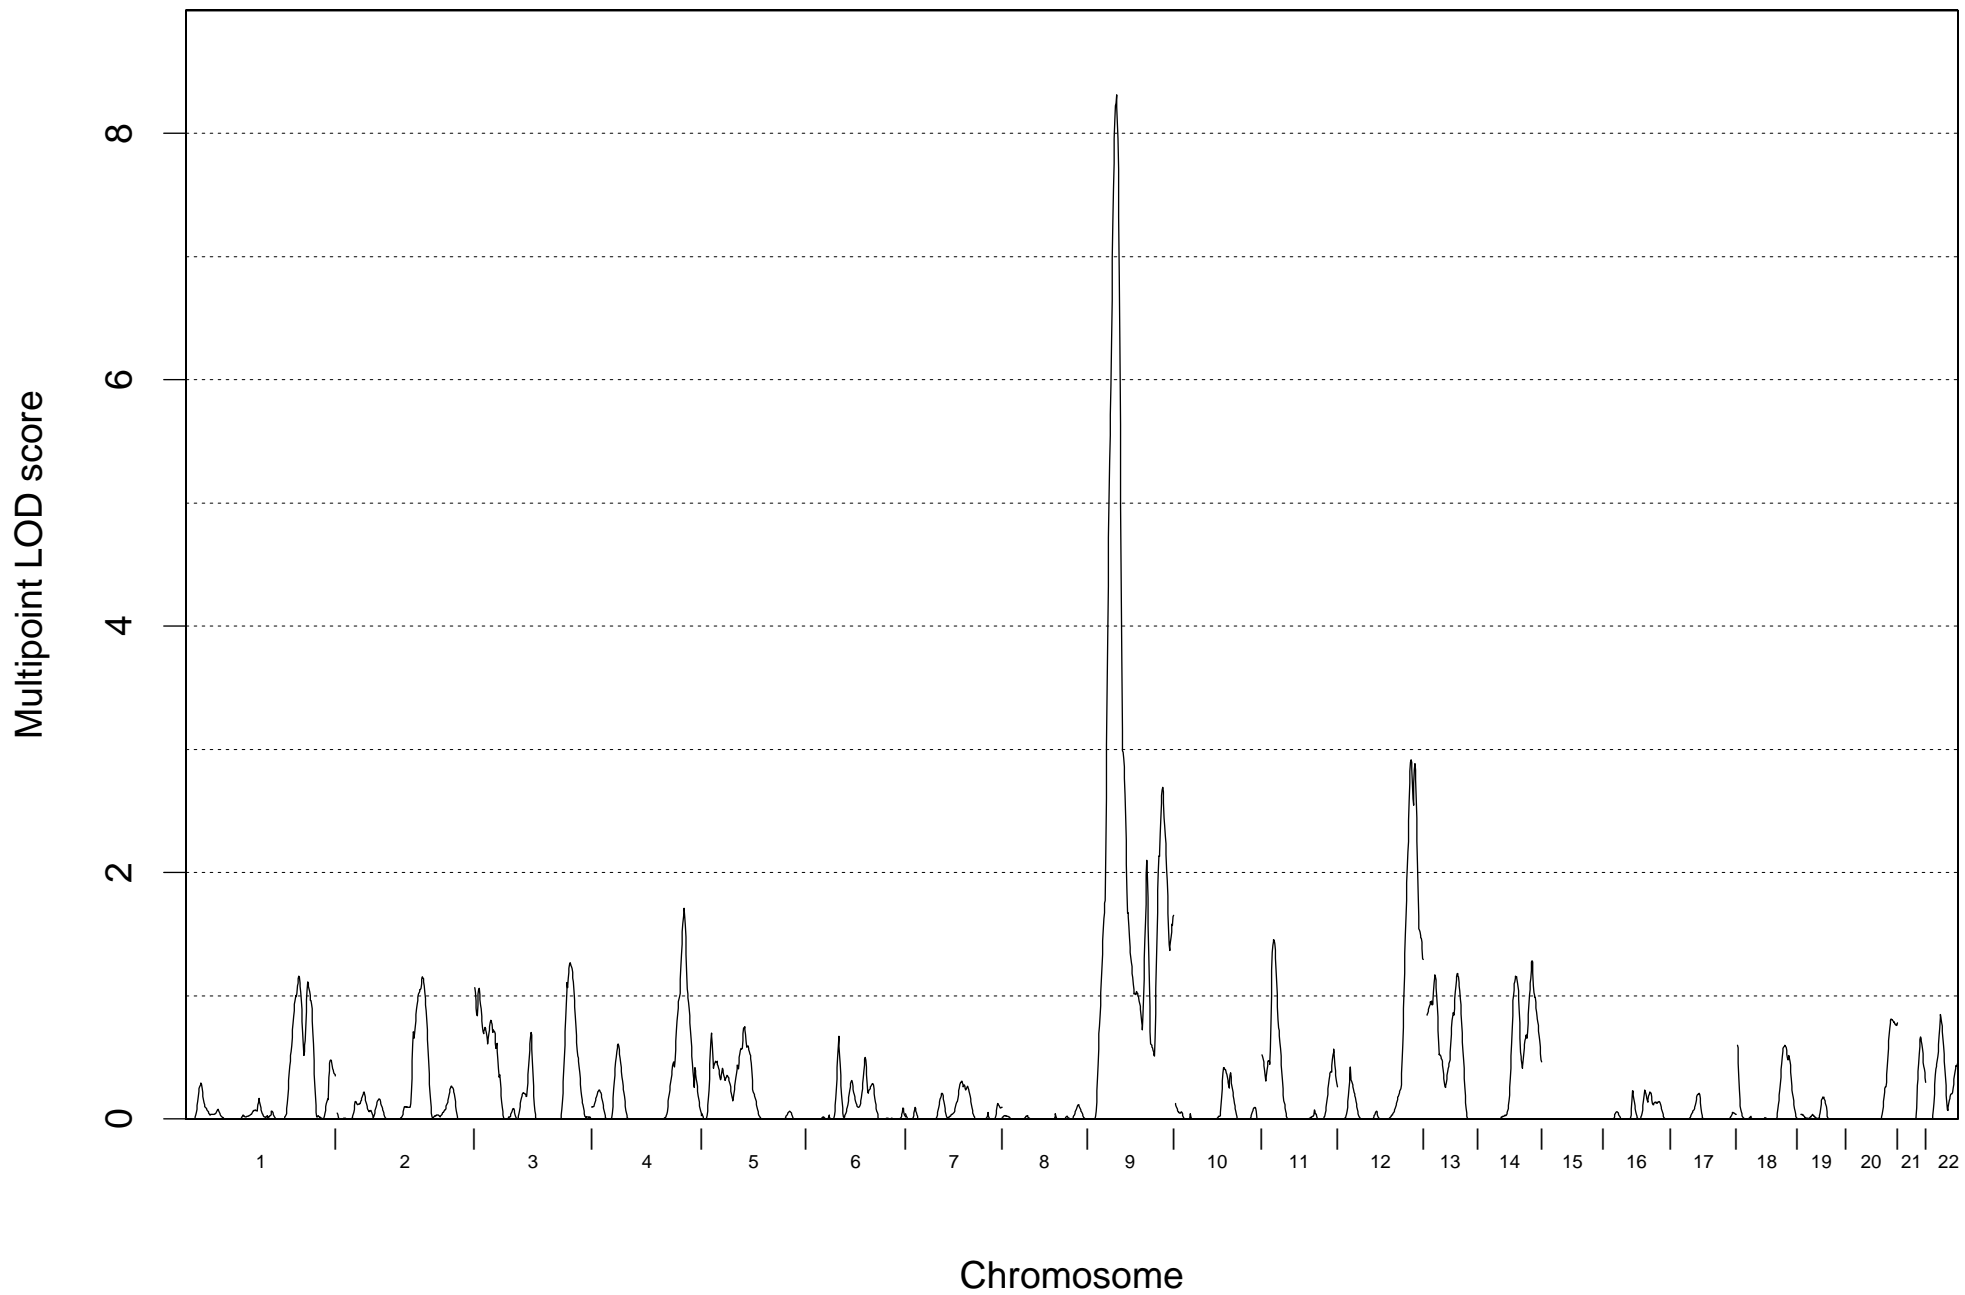

Supplement: NIHMS207110-supplement-01.pdf [file NIHMS207110-supplement-01.pdf]
